# Supplementary material for: A “turn on” fluorescent probe for heparin and its oversulfated chondroitin sulfate contaminant
Source: Royal Society of Chemistry journal article supplement (doi:10.1039/c5sc01675d), 2015-01-01
Supplement: c5sc01675d1.pdf [file c5sc01675d1.pdf]

## Supporting information for

# A “Turn On” Fluorescent Probe for Heparin and Its Oversulfated Chondroitin Sulfate Contaminant

Yubin Ding, Leilei Shi, Hui Wei\*

*Department of Biomedical Engineering, College of Engineering and Applied Sciences, Collaborative Innovation Center of Chemistry for Life Sciences, Nanjing National Laboratory of Microstructures, Nanjing University, Nanjing, Jiangsu, 210093, China. Fax: +86-25-83594648; Tel: +86-25-83593272; E-mail: weihui@nju.edu.cn; Web: weilab.nju.edu.cn*

### Contents

#### Experimental Section

**Table S1.** Recently reported detection methods for heparin.

**Table S2.** Recently reported detection methods for OSCS.

**Figure S1.** <sup>1</sup>H NMR spectrum of TPE-COOH in DMSO-d<sub>6</sub>.

**Figure S2.** HRMS of TPE-COOH, calculated for C<sub>27</sub>H<sub>19</sub>O<sub>2</sub> ([M-H]<sup>-</sup>): 375.1391, observed 375.1381.

**Figure S3.** HPLC profile of TPE-1.

**Figure S4.** ESI-mass spectrum of TPE-1.

**Figure S5.** a) Fluorescence titration profile of TPE-1 (1 μM) with increasing amount of Hep in 10 mM pH 7.4 HEPES/DMSO (95:5, v:v), λ<sub>ex</sub> = 340 nm. b) Corresponding calibration curve of Hep. Inset: linear response curve of Hep.

**Figure S6.** Dalteparin detection with the TPE-1 probe. a) Fluorescence titration profile of TPE-1 (10 μM) with increasing amount of Dalteparin in 10 mM pH 7.4 HEPES/DMSO (95:5, v:v). λ<sub>ex</sub> = 340 nm. b) Corresponding calibration curve of Dalteparin. Inset: linear response curve of Dalteparin.

**Figure S7.** Enoxaparin detection with the TPE-1 probe. a) Fluorescence titration profile of TPE-1 (10 μM) with increasing amount of Enoxaparin in 10 mM pH 7.4 HEPES/DMSO (95:5, v:v). λ<sub>ex</sub> = 340 nm. b) Corresponding calibration curve of Enoxaparin. Inset: linear response curve of Enoxaparin.

**Figure S8.** Heparinases induced fluorescence quenching. a) Time course fluorescence spectra of a mixture of TPE-1 (10 μM) and Hep (5.8 μg/mL) upon addition of heparinase cocktail. b) Corresponding emission intensity at 470 nm as a function of time.

**Figure S9.** Fluorescence titration profile of TPE-1 (10 μM) with increasing amount of OSCS in 10 mM HEPES/DMSO (95:5, v:v, pH 7.4). λ<sub>ex</sub> = 340 nm.

**Figure S10.** The presence of OSCS in Hep enhanced the fluorescence of TPE-1 (10 μM) after heparinase cocktail treatment.

**Figure S11.** Changes in Out<sub>2</sub>/Out<sub>1</sub> values of TPE-1 versus different fragments of (w%) of OSCS in Hep, showing that 0.001% OSCS (w/w) in Hep can be detected. (Out<sub>2</sub>/Out<sub>1</sub>)<sub>0</sub>: the initial value of Out<sub>2</sub>/Out<sub>1</sub> in the absence of OSCS.

## Experimental Section

**Reagents and instruments.** Commercially available solvents and reagents were used as received. Fmoc-Arg(Pbf)-OH, Fmoc-Lys(Boc)-OH, Fmoc-Leu-OH, Fmoc-Gln(Trt)-OH, Fmoc-Val-OH, Fmoc-Ser(tBu)-OH, Fmoc-Ile-OH, Fmoc-Thr(tBu)-OH, 1-hydroxybenzotriazole (HOBt), N,N'-diisopropylcarbodiimide, and Rink amide AM were purchased from TianJin NanKai HeCheng. Heparin (Hep) sodium salt from hog intestine was from TCI (Shanghai) Development Co., Ltd. The molecular weight of Hep was defined as 644.2 g/mol according to the major repeating disaccharide unit with sodium as counter ions.<sup>1</sup> Chondroitin sulfate sodium salt from bovine trachea, hyaluronic acid sodium salt from *Streptococcus equi*, and heparinases I, II, III from *Flavobacterium heparinum* were purchased from Sigma-Aldrich. Deuterated solvents for NMR measurements were available from Aldrich. DNA (GTTTCGCCACCTCTGACTTG) and RNA (GUUUCGCCACCUCUGACUUGTT) were purchased from Sangon Biotech (Shanghai). Fluorescence measurements were performed on a HITACHI F-4600 fluorescence spectrophotometer. <sup>1</sup>H NMR spectra were obtained using a Bruker AM300 spectrometer with tetramethylsilane (TMS) as internal standard. High resolution mass spectrum (HRMS) of tetraphenylethene fluorogen was measured on a LTQ Orbitrap XL spectrometer, while mass spectrum of **TPE-1** was measured using SHIMADZU LCMS-2020.

**Fluorescence measurements.** The fluorescence emission spectra of **TPE-1** (10 μM or 1 μM) were measured at 25 °C in mixed solutions of HEPES buffer and DMSO, with excitation wavelength at 340 nm. The slit width was 5 nm, and the PMT voltage was 700 V. Hep samples were prepared in water.

**Heparinase Treatment.** For the heparinase treatments, cocktail solution of heparinases I, II and III was prepared before use. Stock solutions of heparinases I, II and III were prepared at concentrations of 250 U/mL, 50 U/mL and 25 U/mL. Enzyme cocktail solution was obtained by mixing stock solutions of heparinases I, II and III in a ratio of 1:5:10 (v:v:v), and then diluted for 10 times (~4.7 U/mL total heparinase). Heparinase treatment experiments were performed at 37 °C.

**Synthesis of TPE-1.** The tetraphenylethene fluorogen, 4-(1,2,2-triphenylethenyl)-benzoic acid (TPE-COOH), was synthesized according to the literature method and fully characterized by <sup>1</sup>H NMR and HRMS (Figs. S1 and S2).<sup>2</sup> The tetraphenylethene-peptide conjugate **TPE-1** was synthesized by solid phase peptide synthesis using Fmoc chemistry. The deprotection and cleavage procedures were achieved by treatment with a mixture of TFA/thioanisole/3,6-dioxo-1,8-octanedithiol/H<sub>2</sub>O at room temperature overnight. After cleavage from resin, **TPE-1** was purified by preparative-HPLC with a final yield of 33%. The purity of the obtained **TPE-1** was determined to be 99.7% using an analytical HPLC system on a C<sub>18</sub> column (Fig. S3). MS characterization of **TPE-1** shows a peak at 619.35 [M+3H]<sup>+</sup>, which matches the calculated value 619.03 very well, indicating the successful synthesis of the product (Fig. S4).

## Tables

**Table S1.** Recently reported detection methods for heparin.

| Method                        | Probes                                                             | Response type                 | Dynamic range              | LOD                   | Ref. |
|-------------------------------|--------------------------------------------------------------------|-------------------------------|----------------------------|-----------------------|------|
| Colorimetric                  | Au NPs (positively-charged)                                        | Red to blue color change      | 0.09-3.12 $\mu\text{g/mL}$ | 0.03 $\mu\text{g/mL}$ | 3    |
|                               | Au NPs (protamine-coated)                                          | Blue to red color change      | 0.6-10 $\mu\text{g/mL}$    | 0.6 $\mu\text{g/mL}$  | 4    |
|                               | Au NPs/GO/protamine                                                | Red color                     | 0.06-0.36 $\mu\text{g/mL}$ | 3 ng/mL               | 5    |
|                               | Au NRs/GO/protamine                                                | Turn off                      | 0.02-0.28 $\mu\text{g/mL}$ | 5 ng/mL               | 6    |
|                               | Cationic polythiophene                                             | Yellow to orange color change | 0-56 $\mu\text{M}$         | 0.08 $\mu\text{M}$    | 7    |
|                               | Phloxine B/PEI                                                     | Purple to red color change    | 0.01-0.1 U/mL              | 0.005 U/mL            | 8    |
|                               | Mallard blue                                                       | Turn off                      | 0-20 $\mu\text{M}$         | N.A.                  | 9    |
|                               | Tripodal boronic acid/pyrocatechol violet                          | Turn on                       | N.A.                       | N.A.                  | 10   |
|                               | Polymethinium                                                      | Ratiometric                   | 0-64 $\mu\text{M}$         | N.A.                  | 11   |
| Electrochemical               | Polyimidazolium                                                    | DPV                           | 0.5-10 $\mu\text{M}$       | N.A.                  | 12   |
|                               | Protamine in organic membrane                                      | Potentiometric                | 0.01-0.4 U/mL              | 0.005 U/mL            | 13   |
| Fluorescent                   | Silole (silacyclopentadiene) (AIE)                                 | Turn on                       | 23 nM-13 $\mu\text{M}$     | 23 nM                 | 14   |
|                               | Anthracene/TPE                                                     | Ratiometric                   | 0-15 $\mu\text{M}$         | 20 nM                 | 15   |
|                               | TPE derivative /GO                                                 | Turn on                       | 0-13.2 $\mu\text{M}$       | 10 nM                 | 16   |
|                               | Phloxine B/PEI                                                     | Turn on                       | 0.05-0.3 U/mL              | 0.003 U/mL            | 8    |
|                               | Pyrene derivative/GO                                               | Turn on                       | 0-1.76 U/mL                | 0.046 U/mL            | 17   |
|                               | Pyrene derivative                                                  | Turn on                       | 0.08-1.6 $\mu\text{M}$     | 30 nM                 | 18   |
|                               | Cationic PFBTs                                                     | Ratiometric                   | 30 nM-48 $\mu\text{M}$     | 30 nM                 | 19   |
|                               | Si NPs                                                             | Turn on                       | N.A.                       | 2 $\mu\text{M}$       | 20   |
|                               | Alkynylplatinum terpyridyl complex                                 | Turn on                       | 0-8.7 $\mu\text{M}$        |                       | 21   |
|                               | Salicylaldehyde azine derivative (AIE)                             | Turn on                       | 0.2-14 $\mu\text{g/mL}$    | 57.6 ng/mL            | 22   |
|                               | Tripodal boronic acid                                              | Turn off                      | 0-3.6 $\mu\text{M}$        | N.A.                  | 23   |
|                               | Heparin Orange                                                     | Turn on                       | 0.1-10 $\mu\text{M}$       | N.A.                  | 24   |
|                               | Heparin Blue                                                       | Turn on                       | 0.1-10 $\mu\text{M}$       | N.A.                  | 24   |
|                               | FITC-labeled protamine                                             | Turn off                      | 0-0.65 U/mL                | N.A.                  | 25   |
|                               | Conjugated polyelectrolyte with glucosamine hydrochloride clusters | Turn off                      | 0-1 $\mu\text{M}$          | 0.1 $\mu\text{M}$     | 26   |
|                               | Cationic PFBTs                                                     | Turn on                       | 0-72 $\mu\text{M}$         | N.A.                  | 27   |
| Chromophor-tethered copolymer | Turn off                                                           | 30 nM-0.22 $\mu\text{M}$      | 30 nM                      | 28                    |      |

|                |                           |         |              |              |    |
|----------------|---------------------------|---------|--------------|--------------|----|
| Phosphorescent | Mn-doped ZnS quantum dots | Turn on | 0-70 $\mu$ M | 0.05 $\mu$ M | 29 |
|----------------|---------------------------|---------|--------------|--------------|----|

**Abbreviations:** AIE, aggregation induced emission; DPV, differential pulse voltammogram; FITC, fluorescein-4-isothiocyanate; GO, graphene oxide; N.A., not applicable; PEI, polythyleneimine; PFBTs, poly(fluorene-alt-benzothiadiazole)s; Ref., reference; TPE, tetraphenylethene.

**Table S2.** Recently reported detection methods for OSCS.

| Methods                       | Probes                                     | Response type | LOD (w/w)          | Ref. |
|-------------------------------|--------------------------------------------|---------------|--------------------|------|
| Fluorescent                   | Adenosine-repeated molecular beacon        | Turn on       | 0.01%              | 30   |
|                               | Gold-heparin-dye                           | Turn off      | 10 <sup>-9</sup> % | 31   |
|                               | Polymer-H                                  | Turn on       | 0.5%               | 32   |
|                               | Polymer-H/aXa                              | Turn on       | 0.5%               | 33   |
| NMR                           | N.A.                                       | N.A.          | 0.1%               | 34   |
|                               | N.A.                                       | N.A.          | 0.5%               | 35   |
|                               | N.A.                                       | N.A.          | 0.25%              | 36   |
| SAX-HPLC                      | N.A.                                       | N.A.          | 0.03%              | 37   |
|                               | N.A.                                       | N.A.          | 0.02%              | 38   |
| WAX-HPLC                      | N.A.                                       | N.A.          | 0.025%             | 39   |
| HPLC                          | N.A.                                       | N.A.          | 0.06%              | 40   |
| Capillary electrophoresis     | N.A.                                       | N.A.          | 0.05%              | 41   |
|                               | N.A.                                       | N.A.          | 1%                 | 42   |
|                               | N.A.                                       | N.A.          | 0.1%               | 43   |
| HILIC-MS EIC                  | N.A.                                       | N.A.          | 0.1%               | 44   |
| Pyrolysis MS                  | N.A.                                       | N.A.          | 0.1%               | 45   |
| Raman spectroscopy            | N.A.                                       | N.A.          | 1%                 | 46   |
| Colorimetric microplate       | Cationic polythiophene polymer             | N.A.          | 0.003%             | 47   |
| Heparin enzyme immunoassay    | N.A.                                       | N.A.          | 0.1%               | 48   |
| Electrochemical               | TDMA-doped PVC membrane modified electrode | N.A.          | 0.005%             | 49   |
|                               | TDMA membrane modified electrode           | N.A.          | 0.5%               | 50   |
| Colorimetric microplate       | LPTP/heparinase                            | N.A.          | 0.03%              | 51   |
| Electrokinetic chromatography | N.A.                                       | N.A.          | 0.07%              | 52   |
| Taq pol inhibition            | N.A.                                       | N.A.          | 0.07%              | 53   |

**Abbreviations:** EIC, extract ion chromatography; MS, mass spectroscopy; LPTP, 3-(2-(N-(N'-methylimidazole)ethoxy)-4-methylthiophene; N.A., not applicable; PVC, poly(vinyl chloride); SAX, strong anion-exchange column; TDMA, tridodecylmethylammonium; WAX, weak anion-exchange column.

# Figures

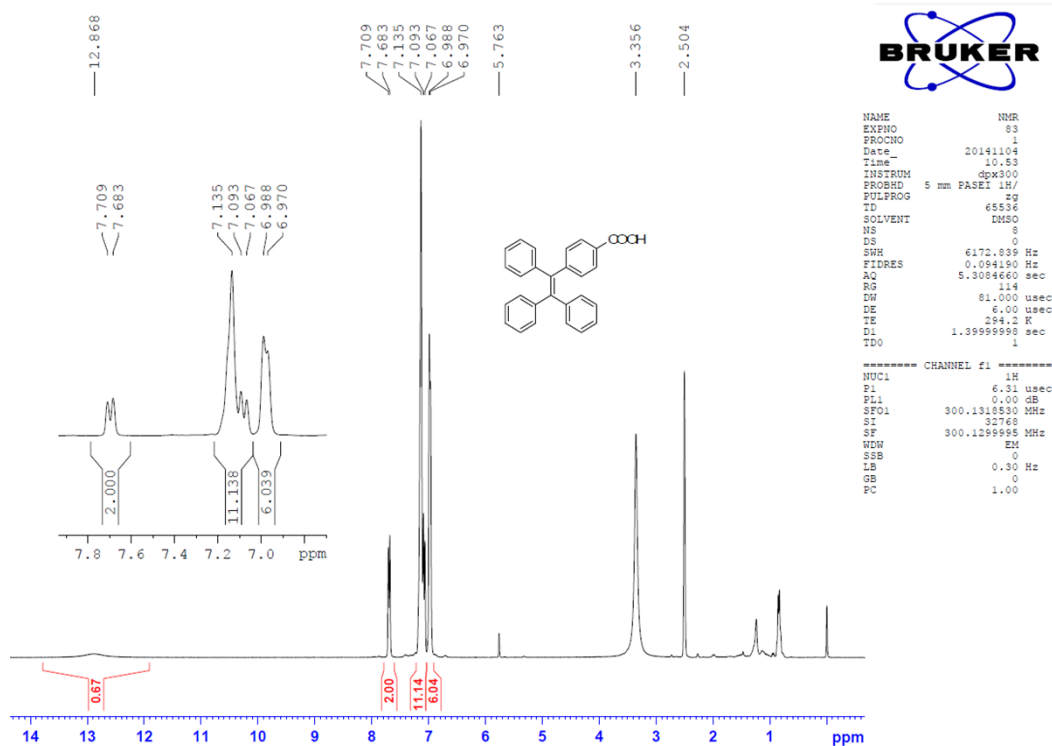

Figure S1. <sup>1</sup>H NMR spectrum of TPE-COOH in DMSO-d<sub>6</sub>.

A63\_1 #9-171 RT: 0.07-1.48 AV: 163 NL: 2.71E7  
T: FTMS - p ESI Full ms [300.00-1000.00]

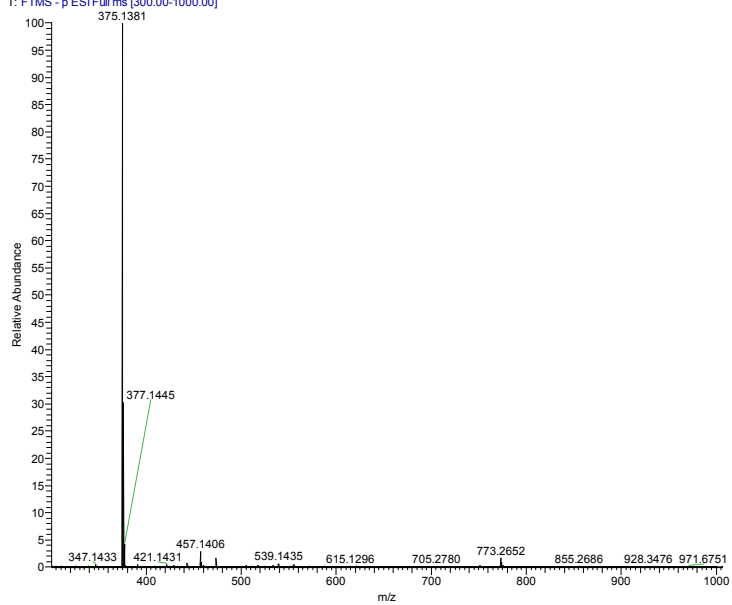

**Figure S2.** HRMS of TPE-COOH, calculated for  $C_{27}H_{19}O_2$  ( $[M-H]^-$ ): 375.1391, observed 375.1381.

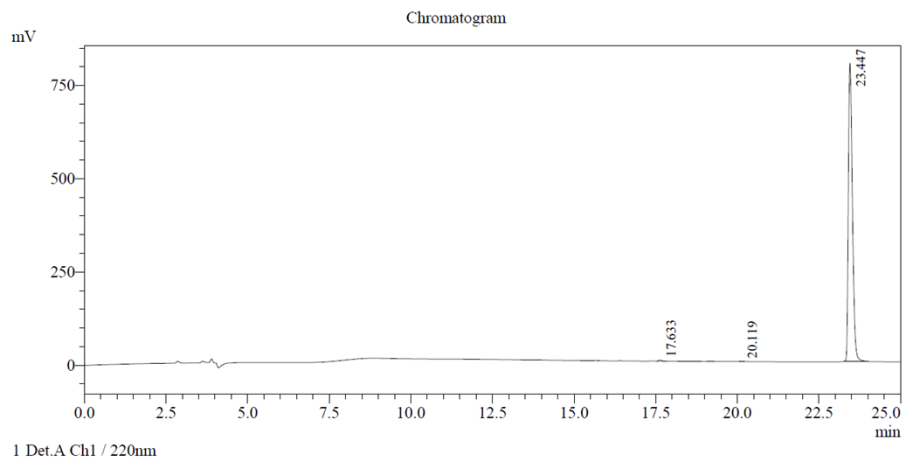

Peak Table

| Peak# | Ret. Time | Area    | Height | Area %  |
|-------|-----------|---------|--------|---------|
| 1     | 17.633    | 15201   | 2604   | 0.218   |
| 2     | 20.119    | 2957    | 587    | 0.042   |
| 3     | 23.447    | 6940901 | 799104 | 99.739  |
| Total |           | 6959058 | 802295 | 100.000 |

**Figure S3.** HPLC profile of **TPE-1**.



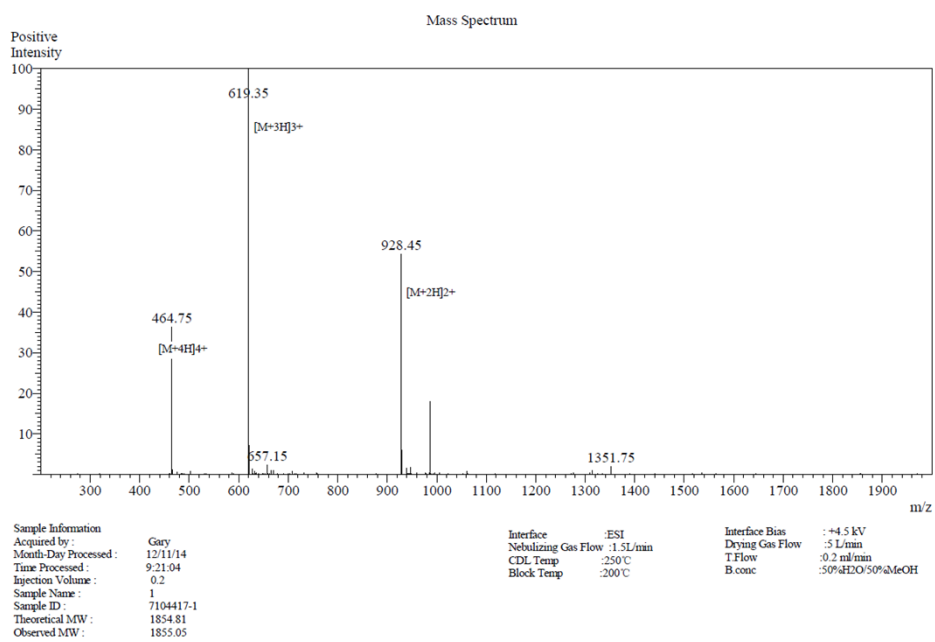

**Figure S4.** ESI-mass spectrum of TPE-1.

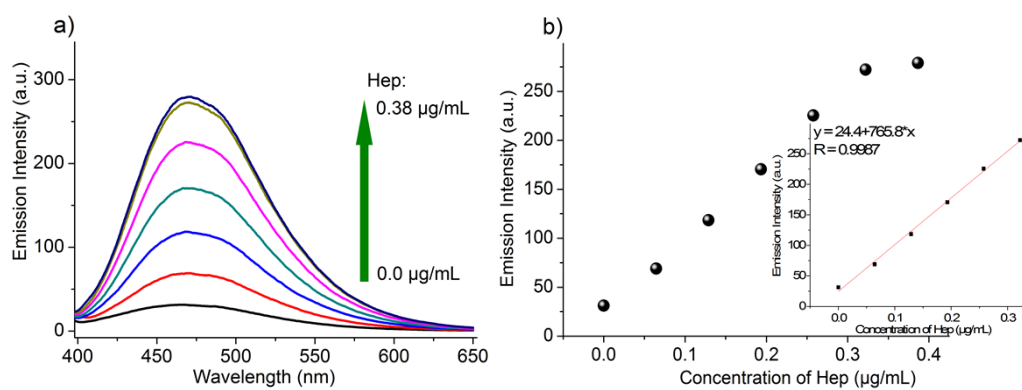

**Figure S5.** a) Fluorescence titration profile of TPE-1 (1 μM) with increasing amount of Hep in 10 mM pH 7.4 HEPES/DMSO (95:5, v:v),  $\lambda_{\text{ex}} = 340$  nm. b) Corresponding calibration curve of Hep. Inset: linear response curve of Hep.

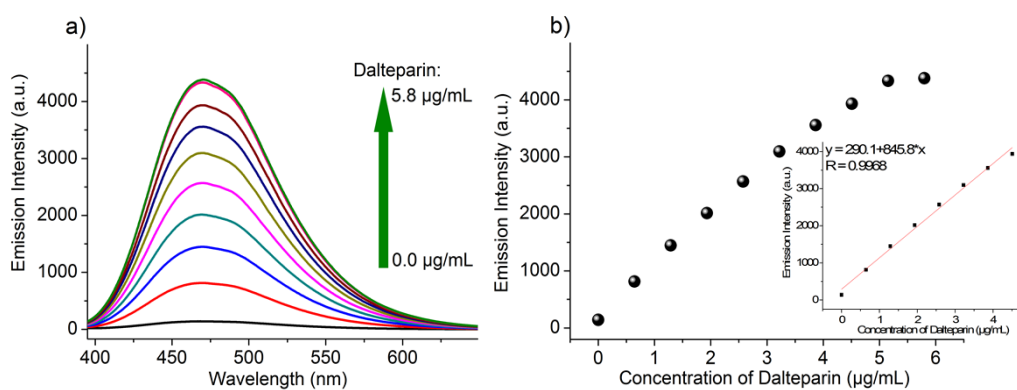

**Figure S6.** Dalteparin detection with the **TPE-1** probe. a) Fluorescence titration profile of **TPE-1** (10 µM) with increasing amount of Dalteparin in 10 mM pH 7.4 HEPES/DMSO (95:5, v:v).  $\lambda_{\text{ex}} = 340$  nm. b) Corresponding calibration curve of Dalteparin. Inset: linear response curve of Dalteparin.

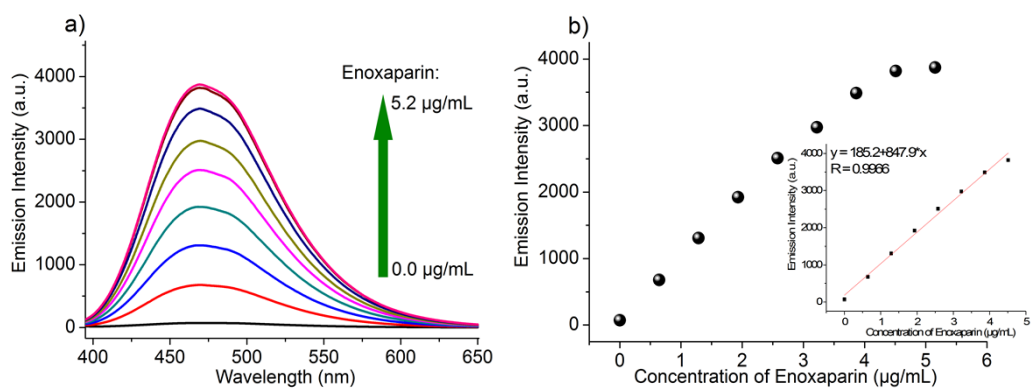

**Figure S7.** Enoxaparin detection with the TPE-1 probe. a) Fluorescence titration profile of TPE-1 (10  $\mu\text{M}$ ) with increasing amount of Enoxaparin in 10 mM pH 7.4 HEPES/DMSO (95:5, v:v).  $\lambda_{\text{ex}} = 340 \text{ nm}$ . b) Corresponding calibration curve of Enoxaparin. Inset: linear response curve of Enoxaparin.

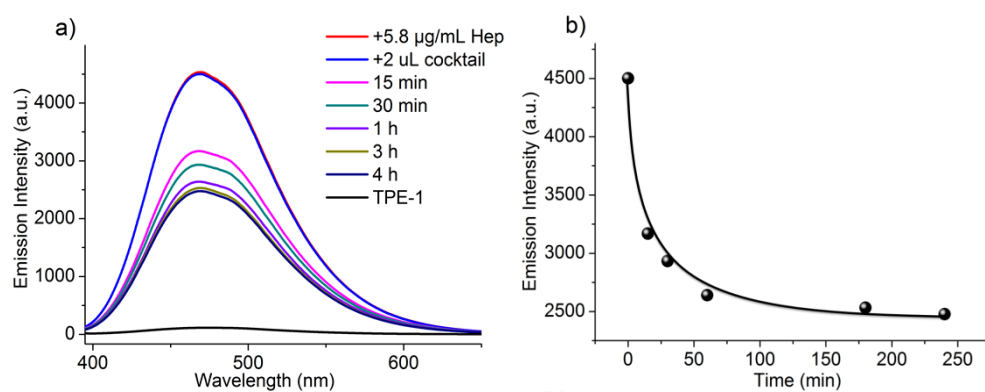

**Figure S8.** Heparinase induced fluorescence quenching. a) Time course fluorescence spectra of a mixture of TPE-1 (10  $\mu$ M) and Hep (5.8  $\mu$ g/mL) upon addition of heparinase cocktail. b) Corresponding emission intensity at 470 nm as a function of time.

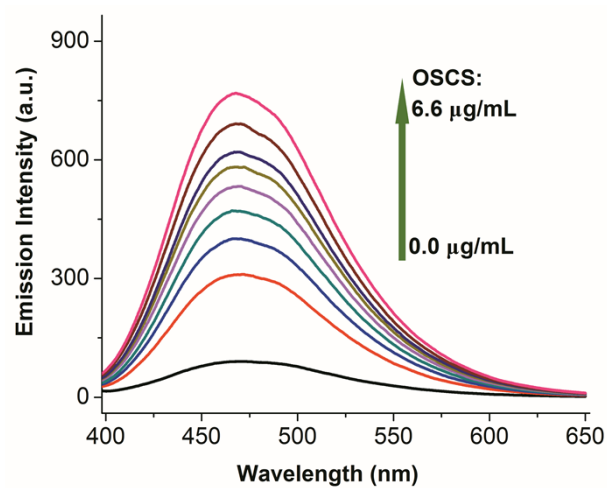

**Figure S9.** Fluorescence titration profile of **TPE-1** (10 μM) with increasing amount of **OSCS** in 10 mM HEPES/DMSO (95:5, v:v, pH 7.4).  $\lambda_{\text{ex}} = 340$  nm.

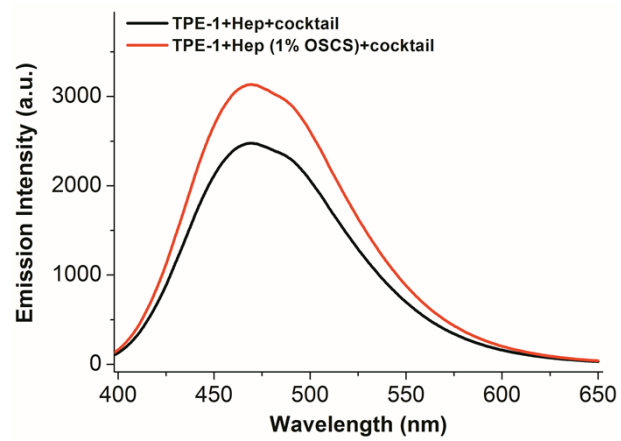

**Figure S10.** The presence of OSCS in Hep enhanced the fluorescence of TPE-1 (10 μM) after heparinase cocktail treatment.

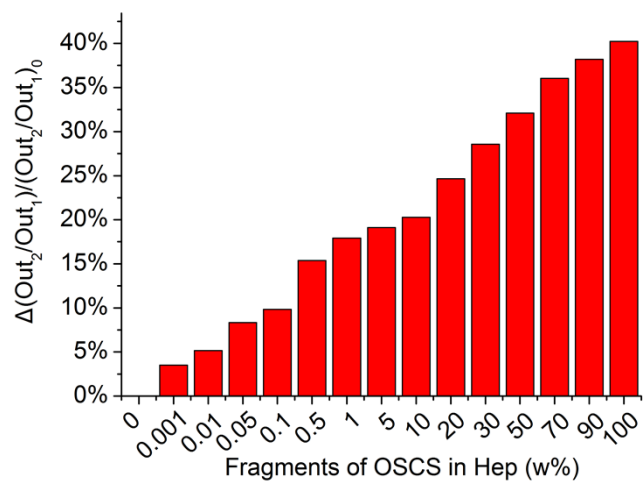

**Figure S11.** Changes in  $Out_2/Out_1$  values of **TPE-1** versus different fragments of (w%) of OSCS in Hep, showing that 0.001% OSCS (w/w) in Hep can be detected.  $(Out_2/Out_1)_0$ : the initial value of  $Out_2/Out_1$  in the absence of OSCS.



## References

1. Z. Liu, Q. Ma, X. Wang, Z. Lin, H. Zhang, L. Liu and X. Su, *Biosens. Bioelectron.*, 2014, **54**, 617-622.
2. G. Liang, L.-T. Weng, J. W. Y. Lam, W. Qin and B. Z. Tang, *ACS Macro Letters*, 2013, **3**, 21-25.
3. R. Cao and B. Li, *Chem. Commun.*, 2011, **47**, 2865-2867.
4. B. K. Jena and C. R. Raj, *Biosens. Bioelectron.*, 2008, **23**, 1285-1290.
5. X. Fu, L. Chen and J. Li, *Analyst*, 2012, **137**, 3653-3658.
6. X. Fu, L. Chen, J. Li, M. Lin, H. You and W. Wang, *Biosens. Bioelectron.*, 2012, **34**, 227-231.
7. R. Zhan, Z. Fang and B. Liu, *Anal. Chem.*, 2010, **82**, 1326-1333.
8. Y. Ling, Z. F. Gao, Q. Zhou, N. B. Li and H. Q. Luo, *Anal. Chem.*, 2015, **87**, 1575-1581.
9. S. M. Bromfield, A. Barnard, P. Posocco, M. Fermeglia, S. Pricl and D. K. Smith, *J. Am. Chem. Soc.*, 2013, **135**, 2911-2914.
10. Z. L. Zhong and E. V. Anslyn, *J. Am. Chem. Soc.*, 2002, **124**, 9014-9015.
11. T. Briza, Z. Kejik, I. Cisarova, J. Kralova, P. Martasek and V. Kral, *Chem. Commun.*, 2008, 1901-1903.
12. H. Qi, L. Zhang, L. Yang, P. Yu and L. Mao, *Anal. Chem.*, 2013, **85**, 3439-3445.
13. Y. Chen, R. N. Liang and W. Qin, *Chin. Chem. Lett.*, 2012, **23**, 233-236.
14. M. Wang, D. Zhang, G. Zhang and D. Zhu, *Chem. Commun.*, 2008, 4469-4471.
15. X. Gu, G. Zhang and D. Zhang, *Analyst*, 2012, **137**, 365-369.
16. R. T. K. Kwok, J. Geng, J. W. Y. Lam, E. Zhao, G. Wang, R. Zhan, B. Liu and B. Z. Tang, *J. Mater. Chem. B*, 2014, **2**, 4134-4141.
17. L. Cai, R. Zhan, K. Y. Pu, X. Qi, H. Zhang, W. Huang and B. Liu, *Anal. Chem.*, 2011, **83**, 7849-7855.
18. L. Zeng, P. Wang, H. Zhang, X. Zhuang, Q. Dai and W. Liu, *Org. Lett.*, 2009, **11**, 4294-4297.
19. K.-Y. Pu and B. Liu, *Macromolecules*, 2008, **41**, 6636-6640.
20. E. Climent, P. Calero, M. D. Marcos, R. Martinez-Manez, F. Sancenon and J. Soto, *Chem. Eur. J.*, 2009, **15**, 1816-1820.
21. M. C. Yeung and V. W. Yam, *Chem. Eur. J.*, 2011, **17**, 11987-11990.
22. H. Liu, P. Song, R. Wei, K. Li and A. Tong, *Talanta*, 2014, **118**, 348-352.
23. A. T. Wright, Z. Zhong and E. V. Anslyn, *Angew. Chem. Int. Ed.*, 2005, **44**, 5679-5682.
24. S. Wang, Y. T. Chang, *Chemical communications* **2008**, 1173-1175.
25. Y. Egawa, R. Hayashida, T. Seki and J. Anzai, *Talanta*, 2008, **76**, 736-741.
26. Q. Chen, Y. Cui, J. Cao and B.-H. Han, *Polymer*, 2011, **52**, 383-390.
27. K.-Y. Pu and B. Liu, *Adv. Funct. Mater.*, 2009, **19**, 277-284.
28. W. Sun, H. Bandmann and T. Schrader, *Chem. Eur. J.*, 2007, **13**, 7701-7707.
29. H. Yan and H. F. Wang, *Anal. Chem.*, 2011, **83**, 8589-8595.
30. C. Y. Lee and W. L. Tseng, *Anal. Chem.*, 2015, **87**, 5031-5035.
31. M. Kalita, S. Balivada, V. P. Swarup, C. Mencio, K. Raman, U. R. Desai, D. Troyer and B. Kuberan, *J. Am. Chem. Soc.*, 2013, **136**, 554-557.
32. S. Luhn, T. Schrader, W. Sun and S. Alban, *J. Pharm. Biomed. Anal.*, 2010, **52**, 1-8.
33. S. Alban, S. Luhn and S. Schiemann, *Anal. Bioanal. Chem.*, 2011, **399**, 681-690.
34. T. Beyer, B. Diehl, G. Randel, E. Humpfer, H. Schäfer, M. Spraul, C. Schollmayer and U. Holzgrabe, *J. Pharm. Biomed. Anal.*, 2008, **48**, 13-19.
35. Z. Zhang, B. Li, J. Suwan, F. Zhang, Z. Wang, H. Liu, B. Mulloy and R. J. Linhardt, *J. Pharm. Sci.*, 2009, **98**, 4017-4026.
36. T. R. Rudd, D. Gaudesi, M. A. Lima, M. A. Skidmore, B. Mulloy, G. Torri, H. B. Nader, M. Guerrini and E. A. Yates, *Analyst*, 2011, **136**, 1390-1398.

37. M. L. Trehy, J. C. Reepmeyer, R. E. Kolinski, B. J. Westenberger and L. F. Buhse, *J. Pharm. Biomed. Anal.*, 2009, **49**, 670-673.
38. D. A. Keire, M. L. Trehy, J. C. Reepmeyer, R. E. Kolinski, W. Ye, J. Dunn, B. J. Westenberger and L. F. Buhse, *J. Pharm. Biomed. Anal.*, 2010, **51**, 921-926.
39. N. Hashii, N. Kawasaki, S. Itoh, Y. Qin, N. Fujita, T. Hattori, K. Miyata, A. Bando, Y. Sekimoto, T. Hama, M. Kashimura, M. Tatsumi, K. Mabuchi, H. Namekawa, T. Sakai, M. Hirose, S. Dobashi, H. Shimahashi, S. Koyama, S. O. Herr, K. Kawai, H. Yoden and T. Yamaguchi, *Biologicals : journal of the International Association of Biological Standardization*, 2010, **38**, 539-543.
40. U. Aich, Z. Shriver, K. Tharakaraman, R. Raman and R. Sasisekharan, *Analytical chemistry*. Chem. 2011, **83**, 7815-7822.
41. G. W. Somsen, Y. H. Tak, J. S. Toraño, P. M. J. M. Jongen and G. J. de Jong, *J. Chromatogr. A*, 2009, **1216**, 4107-4112.
42. N. Volpi, F. Maccari and R. J. Linhardt, *Anal. Biochem.*, 2009, **388**, 140-145.
43. T. Wielgos, K. Havel, N. Ivanova and R. Weinberger, *J. Pharm. Biomed. Anal.*, 2009, **49**, 319-326.
44. G. Li, C. Cai, L. Li, L. Fu, Y. Chang, F. Zhang, T. Toida, C. Xue and R. J. Linhardt, *Anal. Chem.*, 2014, **86**, 326-330.
45. P. Nemes, W. J. Hoover and D. A. Keire, *Anal. Chem.* 2013, **85**, 7405-7412.
46. J. A. Spencer, J. F. Kauffman, J. C. Reepmeyer, C. M. Gryniewicz, W. Ye, D. Y. Toler, L. F. Buhse and B. J. Westenberger, *J. Pharm. Sci.*, 2009, **98**, 3540-3547.
47. C. D. Sommers, D. J. Mans, L. C. Mecker and D. A. Keire, *Anal. Chem.*, 2011, **83**, 3422-3430.
48. S. Bairstow, J. McKee, M. Nordhaus and R. Johnson, *Anal. Biochem.*, 2009, **388**, 317-321.
49. Y. Kang, K. Gwon, J. H. Shin, H. Nam, M. E. Meyerhoff and G. S. Cha, *Anal. Chem.*, 2011, **83**, 3957-3962.
50. L. Wang, S. Buchanan and M. E. Meyerhoff, *Anal. Chem.* , 2008, **80**, 9845-9847.
51. C. D. Sommers and D. A. Keire, *Anal. Chem.*, 2011, **83**, 7102-7108.
52. V. Tripodi, S. Flor, C. Dobrecky, M. Contin and S. Lucangioli, *Electrophoresis*, 2010, **31**, 3606-3612.
53. J. Pan, Y. Qian, X. D. Zhou, A. Pazandak, S. B. Frazier, P. Weiser, H. Lu and L. J. Zhang, *Nat. Biotechnol.*, 2010, **28**, 203-207.
